# Supplementary material
Source: MDPI journal article supplement (https://www.mdpi.com/2077-0472/13/8/1525)
Supplement: s1 [file s1]

Supplementary Figures and Tables

Supplementary Table S1. Mechanical and physical properties of Jerusalem artichoke crop.

| Parameter                                    | Roots               | Tuber               | Stem               |
|----------------------------------------------|---------------------|---------------------|--------------------|
| Poisson's ratio                              | 0.380               | 0.408               | 0.350              |
| Shear modulus (Pa)                           | $4.783 \times 10^6$ | $4.226 \times 10^6$ | $2.72 \times 10^8$ |
| Density/( $\text{kg} \cdot \text{m}^{-3}$ ). | 1132                | 1184.4              | 250.75             |
| X-steel static friction                      | 0.511               | 0.446               | 0.5                |
| X-steel rolling friction                     | 0.201               | 0.275               | 0.05               |
| X-steel restitution                          | 0.320               | 0.620               | 0.53               |

X: Either root or tuber or stem.

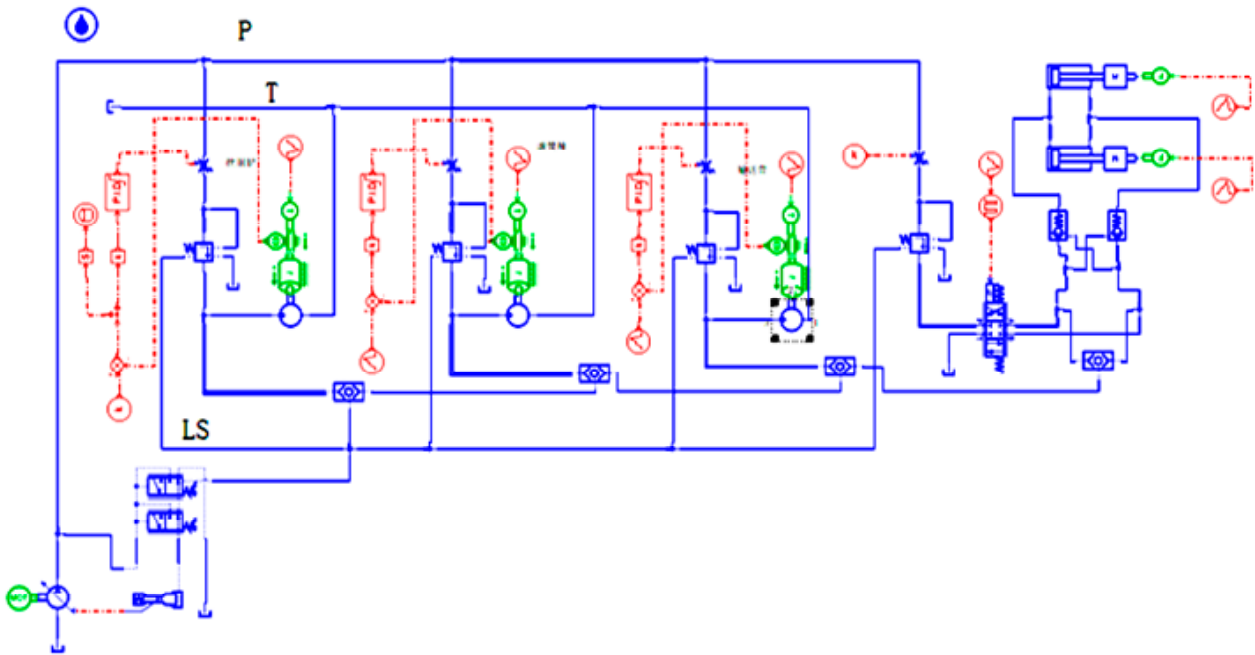

Supplementary Figure S1. Hydraulic system circuit diagram.

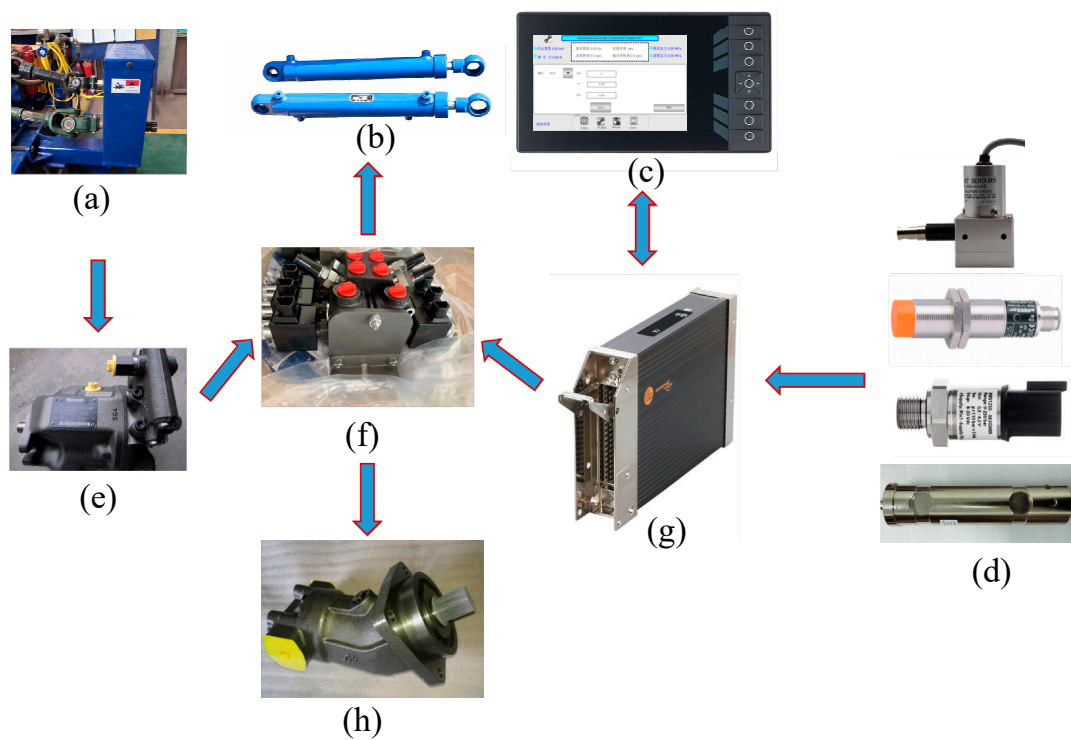

**Supplementary Figure S2.** Control and measuring equipment: (a) PTO input, (b) hydraulic cylinder, (c) user interface module, (d) information acquisition module, (e) hydraulic pump, (f) hydraulic valve module, (g) PLC unit, and (h) hydraulic motor.

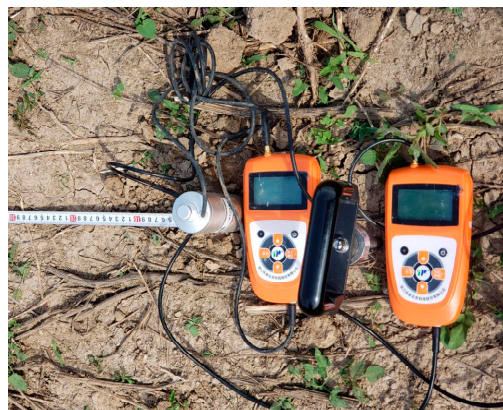

**Supplementary Figure S3.** Field soil moisture meter (left) and soil cone penetrometer (right).

**Supplementary Table S2.** Static angle of repose factors and level.

| Factor | Name                                        | Type    | Minimum | Maximum | Mean | Std. Dev. |
|--------|---------------------------------------------|---------|---------|---------|------|-----------|
| A      | Coefficient of restitution: soil- root      | Numeric | 0.30    | 0.60    | 0.44 | 0.12      |
| B      | Coefficient of restitution: soil-tuber      | Numeric | 0.30    | 0.60    | 0.45 | 0.13      |
| C      | Coefficient of restitution: soil-stem       | Numeric | 0.30    | 0.60    | 0.45 | 0.13      |
| D      | Coefficient of static friction: root-soil   | Numeric | 0.10    | 0.30    | 0.20 | 0.08      |
| E      | Coefficient of static friction: tuber-soil  | Numeric | 0.20    | 0.40    | 0.30 | 0.08      |
| F      | Coefficient of static friction: stem-soil   | Numeric | 0.15    | 0.30    | 0.23 | 0.06      |
| G      | Coefficient of rolling friction: root-soil  | Numeric | 0.01    | 0.03    | 0.02 | 0.01      |
| H      | Coefficient of rolling friction: tuber-soil | Numeric | 0.02    | 0.20    | 0.11 | 0.08      |
| I      | Coefficient of rolling friction: stem-soil  | Numeric | 0.05    | 0.15    | 0.10 | 0.04      |

**Supplementary Table S3.** I-optimal experimental design and data for static angle of repose simulation.

| Run | A    | B    | C    | D    | E    | F    | G    | H    | I    | AoR (°) |
|-----|------|------|------|------|------|------|------|------|------|---------|
| 1   | 0.48 | 0.30 | 0.48 | 0.10 | 0.20 | 0.30 | 0.02 | 0.13 | 0.10 | 38.71   |
| 2   | 0.60 | 0.60 | 0.60 | 0.10 | 0.20 | 0.30 | 0.03 | 0.02 | 0.15 | 33.33   |
| 3   | 0.51 | 0.49 | 0.30 | 0.26 | 0.30 | 0.15 | 0.02 | 0.13 | 0.05 | 34.26   |
| 4   | 0.30 | 0.30 | 0.30 | 0.10 | 0.40 | 0.30 | 0.03 | 0.20 | 0.15 | 21.60   |
| 5   | 0.30 | 0.60 | 0.60 | 0.30 | 0.29 | 0.15 | 0.03 | 0.02 | 0.15 | 28.99   |
| 6   | 0.43 | 0.42 | 0.54 | 0.30 | 0.36 | 0.30 | 0.01 | 0.11 | 0.07 | 33.45   |
| 7   | 0.50 | 0.30 | 0.30 | 0.30 | 0.32 | 0.30 | 0.02 | 0.17 | 0.15 | 36.14   |
| 8   | 0.38 | 0.60 | 0.33 | 0.20 | 0.32 | 0.30 | 0.01 | 0.02 | 0.12 | 35.75   |
| 9   | 0.30 | 0.60 | 0.60 | 0.18 | 0.40 | 0.15 | 0.01 | 0.20 | 0.05 | 39.85   |
| 10  | 0.60 | 0.60 | 0.44 | 0.11 | 0.30 | 0.25 | 0.01 | 0.11 | 0.05 | 30.56   |
| 11  | 0.30 | 0.30 | 0.45 | 0.17 | 0.28 | 0.15 | 0.02 | 0.13 | 0.05 | 26.45   |
| 12  | 0.60 | 0.30 | 0.30 | 0.30 | 0.22 | 0.26 | 0.01 | 0.04 | 0.09 | 20.97   |
| 13  | 0.60 | 0.30 | 0.30 | 0.10 | 0.20 | 0.15 | 0.03 | 0.20 | 0.05 | 33.36   |
| 14  | 0.48 | 0.36 | 0.60 | 0.10 | 0.39 | 0.23 | 0.02 | 0.20 | 0.05 | 28.25   |
| 15  | 0.60 | 0.47 | 0.45 | 0.23 | 0.20 | 0.15 | 0.02 | 0.02 | 0.14 | 25.73   |
| 16  | 0.30 | 0.30 | 0.60 | 0.30 | 0.20 | 0.30 | 0.03 | 0.20 | 0.05 | 33.28   |
| 17  | 0.30 | 0.60 | 0.60 | 0.10 | 0.20 | 0.30 | 0.01 | 0.20 | 0.09 | 40.75   |
| 18  | 0.34 | 0.41 | 0.56 | 0.15 | 0.20 | 0.20 | 0.03 | 0.20 | 0.15 | 22.77   |
| 19  | 0.30 | 0.60 | 0.47 | 0.30 | 0.20 | 0.20 | 0.01 | 0.02 | 0.05 | 19.57   |
| 20  | 0.43 | 0.30 | 0.30 | 0.30 | 0.20 | 0.15 | 0.02 | 0.20 | 0.14 | 22.01   |
| 21  | 0.32 | 0.30 | 0.60 | 0.30 | 0.40 | 0.26 | 0.02 | 0.20 | 0.15 | 37.77   |
| 22  | 0.30 | 0.30 | 0.60 | 0.30 | 0.20 | 0.30 | 0.01 | 0.02 | 0.15 | 39.41   |
| 23  | 0.60 | 0.30 | 0.60 | 0.14 | 0.40 | 0.15 | 0.03 | 0.10 | 0.15 | 26.98   |
| 24  | 0.60 | 0.60 | 0.30 | 0.30 | 0.40 | 0.30 | 0.01 | 0.20 | 0.15 | 25.47   |
| 25  | 0.30 | 0.34 | 0.30 | 0.30 | 0.40 | 0.15 | 0.01 | 0.02 | 0.15 | 21.34   |
| 26  | 0.30 | 0.30 | 0.30 | 0.10 | 0.40 | 0.30 | 0.01 | 0.02 | 0.05 | 27.80   |
| 27  | 0.30 | 0.41 | 0.38 | 0.23 | 0.27 | 0.23 | 0.01 | 0.20 | 0.11 | 39.61   |

|    |      |      |      |      |      |      |      |      |      |       |
|----|------|------|------|------|------|------|------|------|------|-------|
| 28 | 0.43 | 0.42 | 0.60 | 0.10 | 0.27 | 0.15 | 0.01 | 0.02 | 0.08 | 37.93 |
| 29 | 0.51 | 0.60 | 0.59 | 0.19 | 0.40 | 0.30 | 0.03 | 0.20 | 0.11 | 26.65 |
| 30 | 0.41 | 0.47 | 0.45 | 0.30 | 0.40 | 0.15 | 0.03 | 0.20 | 0.08 | 36.04 |
| 31 | 0.33 | 0.60 | 0.39 | 0.14 | 0.40 | 0.30 | 0.01 | 0.20 | 0.05 | 30.11 |
| 32 | 0.60 | 0.60 | 0.30 | 0.30 | 0.20 | 0.30 | 0.03 | 0.02 | 0.05 | 28.05 |
| 33 | 0.53 | 0.30 | 0.53 | 0.30 | 0.28 | 0.17 | 0.03 | 0.02 | 0.05 | 25.50 |
| 34 | 0.40 | 0.60 | 0.30 | 0.10 | 0.40 | 0.15 | 0.03 | 0.02 | 0.07 | 33.10 |
| 35 | 0.60 | 0.60 | 0.30 | 0.21 | 0.30 | 0.22 | 0.03 | 0.13 | 0.15 | 20.73 |
| 36 | 0.58 | 0.41 | 0.30 | 0.14 | 0.20 | 0.30 | 0.01 | 0.20 | 0.15 | 31.37 |
| 37 | 0.30 | 0.41 | 0.30 | 0.22 | 0.20 | 0.25 | 0.03 | 0.05 | 0.09 | 36.08 |
| 38 | 0.33 | 0.47 | 0.32 | 0.23 | 0.38 | 0.15 | 0.03 | 0.07 | 0.15 | 27.14 |
| 39 | 0.60 | 0.44 | 0.30 | 0.10 | 0.40 | 0.30 | 0.02 | 0.07 | 0.10 | 30.37 |
| 40 | 0.54 | 0.40 | 0.60 | 0.20 | 0.20 | 0.30 | 0.02 | 0.02 | 0.05 | 30.36 |
| 41 | 0.60 | 0.59 | 0.50 | 0.10 | 0.30 | 0.15 | 0.02 | 0.20 | 0.13 | 24.52 |
| 42 | 0.34 | 0.53 | 0.49 | 0.10 | 0.40 | 0.23 | 0.02 | 0.08 | 0.15 | 32.07 |
| 43 | 0.30 | 0.54 | 0.53 | 0.10 | 0.30 | 0.30 | 0.03 | 0.05 | 0.05 | 34.05 |
| 44 | 0.30 | 0.41 | 0.38 | 0.23 | 0.27 | 0.23 | 0.01 | 0.20 | 0.11 | 36.15 |
| 45 | 0.60 | 0.30 | 0.60 | 0.10 | 0.37 | 0.30 | 0.01 | 0.02 | 0.15 | 33.65 |
| 46 | 0.43 | 0.30 | 0.32 | 0.10 | 0.29 | 0.21 | 0.02 | 0.02 | 0.15 | 29.11 |
| 47 | 0.46 | 0.41 | 0.60 | 0.10 | 0.40 | 0.29 | 0.01 | 0.02 | 0.05 | 29.48 |
| 48 | 0.60 | 0.60 | 0.60 | 0.30 | 0.40 | 0.17 | 0.02 | 0.02 | 0.05 | 28.66 |
| 49 | 0.30 | 0.30 | 0.59 | 0.18 | 0.40 | 0.23 | 0.03 | 0.02 | 0.10 | 31.26 |
| 50 | 0.30 | 0.60 | 0.30 | 0.10 | 0.20 | 0.15 | 0.01 | 0.12 | 0.15 | 22.70 |
| 51 | 0.60 | 0.30 | 0.38 | 0.25 | 0.35 | 0.30 | 0.03 | 0.20 | 0.05 | 32.06 |
| 52 | 0.53 | 0.30 | 0.36 | 0.17 | 0.40 | 0.18 | 0.01 | 0.17 | 0.11 | 28.14 |
| 53 | 0.60 | 0.30 | 0.60 | 0.30 | 0.20 | 0.15 | 0.01 | 0.20 | 0.05 | 20.95 |
| 54 | 0.60 | 0.43 | 0.60 | 0.30 | 0.25 | 0.26 | 0.03 | 0.14 | 0.11 | 35.15 |
| 55 | 0.56 | 0.60 | 0.37 | 0.30 | 0.20 | 0.29 | 0.01 | 0.20 | 0.08 | 30.78 |
| 56 | 0.30 | 0.60 | 0.30 | 0.30 | 0.40 | 0.26 | 0.03 | 0.11 | 0.05 | 23.60 |
| 57 | 0.47 | 0.60 | 0.60 | 0.26 | 0.26 | 0.20 | 0.01 | 0.12 | 0.15 | 37.33 |
| 58 | 0.30 | 0.60 | 0.42 | 0.30 | 0.20 | 0.30 | 0.02 | 0.20 | 0.15 | 28.13 |
| 59 | 0.50 | 0.41 | 0.42 | 0.29 | 0.40 | 0.29 | 0.03 | 0.02 | 0.15 | 30.97 |
| 60 | 0.50 | 0.60 | 0.59 | 0.19 | 0.20 | 0.16 | 0.03 | 0.12 | 0.05 | 20.18 |
| 61 | 0.41 | 0.60 | 0.30 | 0.10 | 0.21 | 0.26 | 0.02 | 0.20 | 0.05 | 26.96 |

A: Coefficient of restitution: soil- root; B: Coefficient of restitution: soil-tuber; C: Coefficient of restitution: soil-stem; D: Coefficient of static friction: root-soil; E: Coefficient of static friction: tuber-soil; F: Coefficient of static friction: stem-soil; G: Coefficient of rolling friction: root-soil; H: Coefficient of rolling friction: tuber-soil; I: Coefficient of rolling friction: stem-soil; AoR: Static angle of repose.



**Supplementary Table S4.** ANOVA results for static angle of repose simulation (sandy loam soil).

| Source         | Sum of Squares | df | Mean Square | F-value | P-value   | Remark          |
|----------------|----------------|----|-------------|---------|-----------|-----------------|
| Model          | 1891.45        | 36 | 52.54       | 24.16   | < 0.0001* | significant     |
| A              | 34.06          | 1  | 34.06       | 15.66   | 0.0006*   |                 |
| B              | 3.43           | 1  | 3.43        | 1.58    | 0.2212**  |                 |
| C              | 50.3           | 1  | 50.3        | 23.13   | < 0.0001* |                 |
| D              | 7.98           | 1  | 7.98        | 3.67    | 0.0675**  |                 |
| E              | 5.92           | 1  | 5.92        | 2.72    | 0.1119**  |                 |
| F              | 192.47         | 1  | 192.47      | 88.5    | < 0.0001* |                 |
| G              | 44.44          | 1  | 44.44       | 20.43   | 0.0001*   |                 |
| H              | 3.2            | 1  | 3.2         | 1.47    | 0.2367**  |                 |
| I              | 0.0231         | 1  | 0.0231      | 0.0106  | 0.9187**  |                 |
| AF             | 32.04          | 1  | 32.04       | 14.73   | 0.0008*   |                 |
| AG             | 34.34          | 1  | 34.34       | 15.79   | 0.0006*   |                 |
| AI             | 6.82           | 1  | 6.82        | 3.13    | 0.0893**  |                 |
| BC             | 23.44          | 1  | 23.44       | 10.78   | 0.0031*   |                 |
| BE             | 22.33          | 1  | 22.33       | 10.27   | 0.0038*   |                 |
| BF             | 34.01          | 1  | 34.01       | 15.64   | 0.0006*   |                 |
| BG             | 140.55         | 1  | 140.55      | 64.63   | < 0.0001* |                 |
| BH             | 36.21          | 1  | 36.21       | 16.65   | 0.0004*   |                 |
| CE             | 27.99          | 1  | 27.99       | 12.87   | 0.0015*   |                 |
| CG             | 33.11          | 1  | 33.11       | 15.22   | 0.0007*   |                 |
| CI             | 159.83         | 1  | 159.83      | 73.49   | < 0.0001* |                 |
| DG             | 24.84          | 1  | 24.84       | 11.42   | 0.0025*   |                 |
| DH             | 129.57         | 1  | 129.57      | 59.58   | < 0.0001* |                 |
| DI             | 50.92          | 1  | 50.92       | 23.41   | < 0.0001* |                 |
| EF             | 222.05         | 1  | 222.05      | 102.1   | < 0.0001* |                 |
| EH             | 7.89           | 1  | 7.89        | 3.63    | 0.0688**  |                 |
| FI             | 66.17          | 1  | 66.17       | 30.42   | < 0.0001* |                 |
| GH             | 71.59          | 1  | 71.59       | 32.92   | < 0.0001* |                 |
| GI             | 36.29          | 1  | 36.29       | 16.68   | 0.0004*   |                 |
| HI             | 42.46          | 1  | 42.46       | 19.52   | 0.0002*   |                 |
| A <sup>2</sup> | 6.53           | 1  | 6.53        | 3       | 0.0959**  |                 |
| B <sup>2</sup> | 86.59          | 1  | 86.59       | 39.82   | < 0.0001* |                 |
| C <sup>2</sup> | 11.72          | 1  | 11.72       | 5.39    | 0.0291*   |                 |
| E <sup>2</sup> | 60.65          | 1  | 60.65       | 27.88   | < 0.0001* |                 |
| F <sup>2</sup> | 18.99          | 1  | 18.99       | 8.73    | 0.0069*   |                 |
| I <sup>2</sup> | 67.82          | 1  | 67.82       | 31.18   | < 0.0001* |                 |
| Residual       | 52.2           | 24 | 2.17        |         |           | not significant |
| Lack of Fit    | 46.21          | 23 | 2.01        | 0.3358  | 0.9022    |                 |
| Pure Error     | 5.98           | 1  | 5.98        |         |           |                 |
| Cor Total      | 1943.65        | 60 |             |         |           |                 |

\*: Statistically significant (p&lt;0.05).

\*\* : Statistically not significant ( $p>0.05$ )

A: Coefficient of restitution: soil- root; B: Coefficient of restitution: soil-stem; C: Coefficient of static friction: root-soil; E: Coefficient of static friction: tuber-soil; F: Coefficient of static friction: stem-soil; G: Coefficient of rolling friction: root-soil; H: Coefficient of rolling friction: tuber-soil; I: Coefficient of rolling friction: stem-soil .

**Supplementary Table S5.** Box-Behnken experimental design and result for the angle of repose simulation (Clay soil).

| Run | A   | B    | C     | D ( $\text{Jm}^{-3}$ ) | Angle of repose ( $^{\circ}$ ) |
|-----|-----|------|-------|------------------------|--------------------------------|
| 1   | 0.2 | 0.45 | 0.15  | 26000                  | 36.87                          |
| 2   | 0.4 | 0.45 | 0.5   | 38000                  | 54.53                          |
| 3   | 0.4 | 0.45 | 0.325 | 26000                  | 47.97                          |
| 4   | 0.4 | 0.2  | 0.15  | 26000                  | 23.88                          |
| 5   | 0.4 | 0.2  | 0.325 | 38000                  | 27.54                          |
| 6   | 0.6 | 0.45 | 0.5   | 26000                  | 48.85                          |
| 7   | 0.2 | 0.2  | 0.325 | 26000                  | 30.34                          |
| 8   | 0.4 | 0.45 | 0.325 | 26000                  | 45.61                          |
| 9   | 0.4 | 0.45 | 0.15  | 14000                  | 36.95                          |
| 10  | 0.6 | 0.2  | 0.325 | 26000                  | 25.39                          |
| 11  | 0.4 | 0.7  | 0.325 | 38000                  | 48.90                          |
| 12  | 0.6 | 0.45 | 0.325 | 38000                  | 47.66                          |
| 13  | 0.2 | 0.45 | 0.325 | 38000                  | 49.22                          |
| 14  | 0.4 | 0.45 | 0.325 | 26000                  | 46.28                          |
| 15  | 0.4 | 0.2  | 0.325 | 14000                  | 29.22                          |
| 16  | 0.6 | 0.45 | 0.15  | 26000                  | 34.43                          |
| 17  | 0.6 | 0.45 | 0.325 | 14000                  | 38.24                          |
| 18  | 0.6 | 0.7  | 0.325 | 26000                  | 47.78                          |
| 19  | 0.4 | 0.45 | 0.5   | 14000                  | 51.07                          |
| 20  | 0.2 | 0.45 | 0.5   | 26000                  | 53.74                          |
| 21  | 0.4 | 0.2  | 0.5   | 26000                  | 29.43                          |
| 22  | 0.4 | 0.45 | 0.325 | 26000                  | 49.23                          |
| 23  | 0.4 | 0.7  | 0.325 | 14000                  | 48.91                          |
| 24  | 0.4 | 0.45 | 0.15  | 38000                  | 35.37                          |
| 25  | 0.4 | 0.7  | 0.15  | 26000                  | 36.96                          |
| 26  | 0.2 | 0.7  | 0.325 | 26000                  | 52.14                          |
| 27  | 0.4 | 0.45 | 0.325 | 26000                  | 46.92                          |

|    |     |      |       |       |       |
|----|-----|------|-------|-------|-------|
| 28 | 0.2 | 0.45 | 0.325 | 14000 | 50.26 |
| 29 | 0.4 | 0.7  | 0.5   | 26000 | 55.60 |

A: Restitution; B: Static Friction; C: Rolling Friction; D: Cohesive Energy Density.

**Supplementary Table S6.** ANOVA results for static angle of repose simulation (clay soil).

| Source                    | Sum of Squares | df | Mean Square | F-value | p-value   | Remarks         |
|---------------------------|----------------|----|-------------|---------|-----------|-----------------|
| <b>Model</b>              | 2553.04        | 14 | 182.36      | 60.06   | < 0.0001* | significant     |
| A-Restitution             | 76.12          | 1  | 76.12       | 25.07   | 0.0002*   |                 |
| B-Static Friction         | 1291.37        | 1  | 1291.37     | 425.29  | < 0.0001* |                 |
| C-Rolling Friction        | 656.73         | 1  | 656.73      | 216.28  | < 0.0001* |                 |
| D-Cohesive Energy Density | 6.10           | 1  | 6.10        | 2.01    | 0.1781**  |                 |
| AB                        | 0.0884         | 1  | 0.0884      | 0.0291  | 0.8669**  |                 |
| AC                        | 1.51           | 1  | 1.51        | 0.4964  | 0.4926**  |                 |
| AD                        | 27.35          | 1  | 27.35       | 9.01    | 0.0095*   |                 |
| BC                        | 42.78          | 1  | 42.78       | 14.09   | 0.0021*   |                 |
| BD                        | 0.6965         | 1  | 0.6965      | 0.2294  | 0.6394**  |                 |
| CD                        | 6.37           | 1  | 6.37        | 2.10    | 0.1695**  |                 |
| A <sup>2</sup>            | 2.52           | 1  | 2.52        | 0.8291  | 0.3779**  |                 |
| B <sup>2</sup>            | 412.88         | 1  | 412.88      | 135.97  | < 0.0001* |                 |
| C <sup>2</sup>            | 50.10          | 1  | 50.10       | 16.50   | 0.0012*   |                 |
| D <sup>2</sup>            | 0.4220         | 1  | 0.4220      | 0.1390  | 0.7149**  |                 |
| <b>Residual</b>           | 42.51          | 14 | 3.04        |         |           |                 |
| Lack of Fit               | 34.33          | 10 | 3.43        | 1.68    | 0.3258    | not significant |
| Pure Error                | 8.18           | 4  | 2.04        |         |           |                 |
| <b>Cor Total</b>          | 2595.55        | 28 |             |         |           |                 |

A: Restitution B: Static Friction C: Rolling Friction D: Cohesive Energy Density

\*: Statistically significant (p<0.05)

\*\*: Statistically not significant (p>0.05).

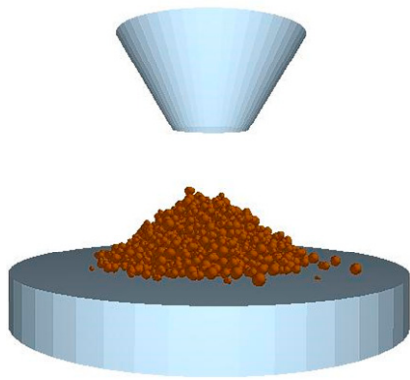

(a)

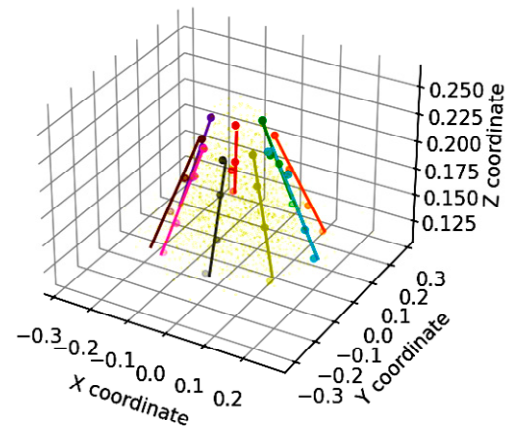

(b)

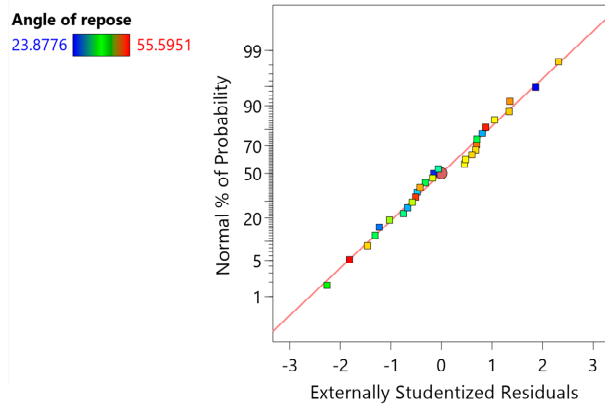

(c)

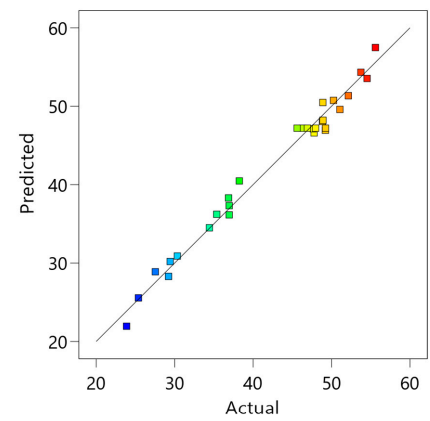

(d)

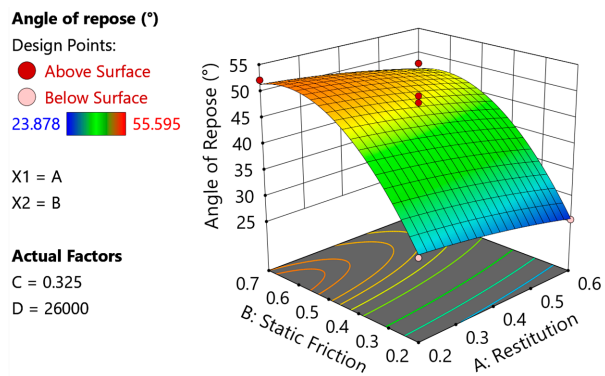

(e)

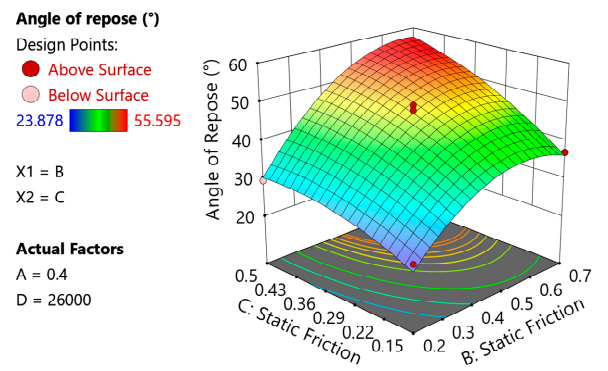

(f)

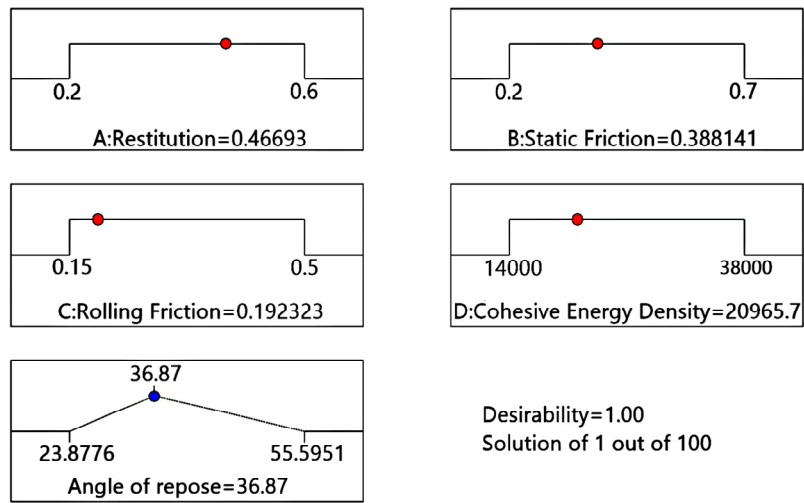

(g)

**Supplementary Figure S4.** DEM input parameter calibration for the clay soil: (a) static angle of repose test, (b) static angle of repose measurement using EDEMPy script, (c) normal plot of residuals, (d) predicted versus actual diagnostic plot, (e) static angle of repose 3D surface plot for rolling friction and static friction, (f) static angle of repose 3D surface plot for static friction and restitution, (g) numerical optimisation result.
